# Supplementary material
Source: PubMed Central journal article supplement (PMC7442419)
Supplement: noz155_suppl_supplementary_material.pdf [file noz155_suppl_supplementary_material.pdf]

**Supplemental table 1A. Univariate analysis of patient cohort**

| <b>PFS</b>                                  | <b>EGFR/ALK+ NSCLC<br/>HR (95%CI)</b> | <b>P</b> | <b>Wild type<br/>HR (95%CI)</b> | <b>P</b> |
|---------------------------------------------|---------------------------------------|----------|---------------------------------|----------|
| <b>Age ( &lt; 50 vs. 50-60 vs. &gt; 60)</b> | 0.86 ( 0.64 , 1.15 )                  | 0.30     | 0.97 ( 0.80 , 1.19 )            | 0.78     |
| <b>KPS (&lt; 70 vs. 70-80 vs. &gt; 80)</b>  | 0.62 ( 0.42 , 0.93 )                  | 0.02     | 0.72 ( 0.58, 0.90 )             | 0.003    |
| <b>Brain Mets. (1 vs. 2-3 vs. &gt; 3)</b>   | 0.96 ( 0.74 , 1.26 )                  | 0.78     | 1.23 ( 1.04 , 1.45 )            | 0.014    |
| <b>Symptomatic</b>                          | 1.32 ( 0.81 , 2.16 )                  | 0.26     | 1.12 ( 0.82,1.54 )              | 0.47     |
| <b>Synchronous</b>                          | 0.78 ( 0.49 , 1.25 )                  | 0.31     | 0.80 ( 0.61, 1.07 )             | 0.13     |
| <b>ECM (No/yes)</b>                         | 0.59 ( 0.36, 0.99 )                   | 0.046    | 1.38 ( 1.04, 1.84 )             | 0.026    |
| <b>OS</b>                                   |                                       |          |                                 |          |
| <b>Age ( &lt; 50 vs. 50-60 vs. &gt; 60)</b> | 1.29 ( 0.91 , 1.81 )                  | 0.15     | 1.10 ( 0.89 , 1.36 )            | 0.36     |
| <b>KPS (&lt; 70 vs. 70-80 vs. &gt; 80)</b>  | 0.38 ( 0.25 , 0.59 )                  | <0.001   | 0.69 ( 0.55 , 0.87 )            | 0.001    |
| <b>Brain Mets. (1 vs. 2-3 vs. &gt; 3)</b>   | 0.91 ( 0.68 , 1.21 )                  | 0.51     | 1.32 ( 1.10 , 1.57 )            | 0.003    |
| <b>Symptomatic</b>                          | 1.23 ( 0.73 , 2.08 )                  | 0.43     | 0.99 ( 0.71 , 1.39 )            | 0.97     |
| <b>Synchronous</b>                          | 0.77 ( 0.47 , 1.27 )                  | 0.31     | 0.85 ( 0.63 , 1.15 )            | 0.29     |
| <b>ECM (No/Yes)</b>                         | 1.30 ( 0.75, 2.26 )                   | 0.35     | 1.87 ( 1.37, 2.56 )             | <0.001   |

Abbreviations: ECM, extracranial metastases; KPS, Karnofsky performance status; NSCLC, non-small cell lung cancer; OS, overall survival; PFS, progression free survival.

**Supplementary table 1B: Association between brain metastases and extracranial metastases**

|                                 | <b>Mutation positive cohort</b> | <b>Wild type cohort</b> |
|---------------------------------|---------------------------------|-------------------------|
| <b>P value of associations*</b> | <b>0.64</b>                     | <b>0.027</b>            |

\* Cochran-Armitage Trend test

**Supplemental Table 2. Multivariable analysis on PFS/OS excluding ECM for independent level of number of BM**

| <b>A. PFS</b>             |                                  |                 |                                  |                 |
|---------------------------|----------------------------------|-----------------|----------------------------------|-----------------|
|                           | <b><i>EGFR/ALK+</i> NSCLC</b>    | <b><i>P</i></b> | <b>Wild type</b>                 | <b><i>P</i></b> |
|                           | <b>Estimated Median (Months)</b> |                 | <b>Estimated Median (Months)</b> |                 |
| <b>BM = 1</b>             | 8.85                             | 0.54            | 8.03                             | 0.060           |
| <b>BM = 2-3</b>           | 7.57                             | 0.21            | 6.72                             | 0.84            |
| <b>BM &gt; 3</b>          | 12.6                             | Ref             | 6.33                             | Ref             |
| <b><i>P</i> (overall)</b> | 0.56                             |                 | 0.029                            |                 |

  

| <b>B. OS</b>              |                                  |                 |                                  |                 |
|---------------------------|----------------------------------|-----------------|----------------------------------|-----------------|
|                           | <b><i>EGFR/ALK+</i> NSCLC</b>    | <b><i>P</i></b> | <b>Wild Type</b>                 | <b><i>P</i></b> |
|                           | <b>Estimated Median (Months)</b> |                 | <b>Estimated Median (Months)</b> |                 |
| <b>BM = 1</b>             | 21.1                             | 0.84            | 13.8                             | 0.007           |
| <b>BM = 2-3</b>           | 19.1                             | 0.74            | 11.0                             | 0.38            |
| <b>BM &gt; 3</b>          | 23.7                             | Ref             | 8.1                              | Ref             |
| <b><i>P</i> (overall)</b> | 0.74                             |                 | 0.006                            |                 |

*BM* > 3 were treated as reference group. Each level of *BM* was compared to the reference group  
 Abbreviations: *BM*, brain metastasis; *ECM*, extracranial metastases; *NSCLC*, non-small cell lung cancer;  
*OS*, overall survival; *PFS*, progression free survival.

**Supplemental Table 3. Multivariable analysis including ECM on PFS/OS for independent level of number of BM**

| <b>A. PFS</b>      |                                  |          |                                  |          |
|--------------------|----------------------------------|----------|----------------------------------|----------|
|                    | <b>EGFR/ALK+ NSCLC</b>           | <b>P</b> | <b>Wild type</b>                 | <b>P</b> |
|                    | <b>Estimated Median (Months)</b> |          | <b>Estimated Median (Months)</b> |          |
| <b>BM = 1</b>      | 9.5                              | 0.63     | 8.03                             | 0.16     |
| <b>BM = 2-3</b>    | 7.57                             | 0.11     | 6.72                             | 0.79     |
| <b>BM &gt; 3</b>   | 12.7                             | Ref      | 6.33                             | Ref      |
| <b>P (overall)</b> | 0.65                             |          | 0.084                            |          |

  

| <b>B. OS</b>       |                                  |          |                                  |          |
|--------------------|----------------------------------|----------|----------------------------------|----------|
|                    | <b>EGFR/ALK+ NSCLC</b>           | <b>P</b> | <b>Wild type</b>                 | <b>P</b> |
|                    | <b>Estimated Median (Months)</b> |          | <b>Estimated Median (Months)</b> |          |
| <b>BM = 1</b>      | 21.1                             | 0.76     | 13.8                             | 0.09     |
| <b>BM = 2-3</b>    | 19.1                             | 0.84     | 11.0                             | 0.98     |
| <b>BM &gt; 3</b>   | 23.7                             | Ref      | 8.3                              | Ref      |
| <b>P (overall)</b> | 0.76                             |          | 0.063                            |          |

*BM* > 3 were treated as reference group. Each level of *BM* was compared to the reference group  
 Abbreviations: *BM*, brain metastasis; *ECM*, extracranial metastases; *NSCLC*, non-small cell lung cancer;  
*OS*, overall survival; *PFS*, progression free survival.
